# Supplementary material for: Synthesis, photoluminescence and field emission properties of well aligned/well patterned conical shape GaN nanorods
Source: Royal Society of Chemistry journal article supplement (doi:10.1039/c2ce25800e), 2012-01-01
Supplement: c2ce25800e.pdf [file c2ce25800e.pdf]

# Supplementary Information

Journal: CrystEngComm

**TITLE: Synthesis, photoluminescence and field emission properties of well aligned/ well patterned conical shape GaN nano-rods.**

Field emission measurements of poor patterned GaN nano-rods synthesized at 1000°C has also been performed in a vacuum chamber with a pressure of  $1.2 \times 10^{-6}$  Pa at room temperature. A rod-like stainless steel probe (1mm in diameter) of  $0.78 \text{ mm}^2$  in area has been used as an anode and the product used as cathode. The spacing between these two electrodes was  $200 \mu\text{m}$ . Fig. S1 depicts the exponential dependence of the emission current density (J) on the applied electric field (E).

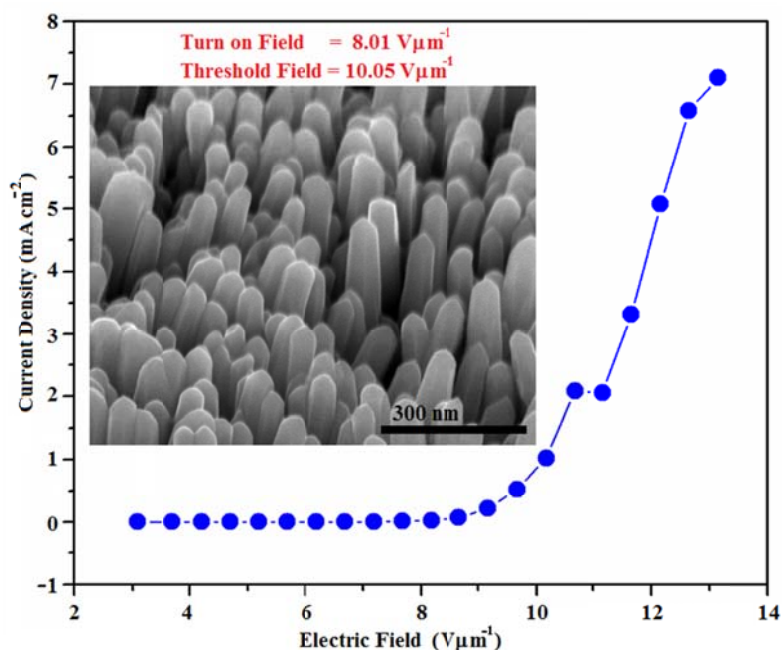

Fig. S1: shows the field emission properties (J-E curve) of non-aligned GaN nano-rods synthesized at 1000 °C. (Inset is the SEM of poor patterned/ non-aligned GaN nanorods)

The turn-on field of  $8.01 \text{ V}\mu\text{m}^{-1}$  and threshold field of  $10.05 \text{ V}\mu\text{m}^{-1}$  has been obtained for poor patterned /non-aligned nano-rods synthesized at  $1000 \text{ }^\circ\text{C}$  as shown in Fig. S1. Since the nanorods synthesized at  $1000 \text{ }^\circ\text{C}$  are non-aligned and their tip is also not sharp, so their turn on and threshold value is greater than well-aligned GaN nanorods prepared at  $1100 \text{ }^\circ\text{C}$  and  $1200 \text{ }^\circ\text{C}$  . From the high turn on values of poor patterned GaN nano-rods it can be concluded that low turn on value is related to the well aligned growth of GaN nanorods.
